# Supplementary material for: Platelet Proteome Reveals Novel Targets for Hypercoagulation in Pseudoexfoliation Syndrome
Source: MDPI journal article supplement (doi:10.3390/ijms25031403), 2024-01-24
Supplement: s1 [file s1]

**Table S1.** ROTEM parameters for healthy controls, PEX and RVO patients in Extem, Intem and Fibtem test results.

|               | <b>Healthy Controls</b><br><b>n=42</b> | <b>PEX</b><br><b>n=29</b> | <b>RVO</b><br><b>n=6</b> |
|---------------|----------------------------------------|---------------------------|--------------------------|
| <b>EXTEM</b>  |                                        |                           |                          |
| CT (s)        | 59.45±9.185                            | 58.79±6.884               | 60.33±4.926              |
| A10 (mm)      | 57.39±4.577                            | 60.48±5.207*              | 61.17±4.446              |
| A20 (mm)      | 63.84±3.942                            | 65.93±4.527               | 67.17±3.71               |
| CFT (s)       | 79.21±17.13                            | 69.07±15.08*              | 64.17±11.32*             |
| MCF (mm)      | 65.03±3.81                             | 66.97±4.492               | 69±2.757                 |
| Alfa (°)      | 74.37±3.436                            | 76.14±3.079               | 77.33±2.338              |
| <b>INTEM</b>  |                                        |                           |                          |
| CT (s)        | 182.2±32.17                            | 178.4±33.16               | 201.2±50.82              |
| A10 (mm)      | 55.74±4.283                            | 57.72±4.052               | 57.5±1.732               |
| A20 (mm)      | 61.64±4.035                            | 63.21±3.986               | 63.83±2.639              |
| CFT (s)       | 79.05±17.3                             | 73.52±14.1                | 73.33±11.13              |
| MCF (mm)      | 62.38±3.994                            | 64.03±3.959               | 64.83±2.229              |
| Alfa (°)      | 74.45±3.394                            | 75.28±2.685               | 56.83±3.312**            |
| <b>FIBTEM</b> |                                        |                           |                          |
| CT (s)        | 57.82±6.79                             | 56.68±6.171               | 59.67±6.154              |
| CFT (s)       | 399.3±319.3                            | 526.3±346.6               | 401±358.2                |
| A10 (mm)      | 18.29±3.872                            | 19.21±3.675               | 20.17±4.579              |
| A20 (mm)      | 19.17±4.018                            | 19.21±3.675               | 21.17±4.792              |
| MCF (mm)      | 19.29±3.996                            | 21.93±6.892               | 21.33±4.761              |
| Alfa (°)      | 71.85±4.638                            | 72.96±3.405               | 73.33±4.803              |

\*p<0.05, \*\*p<0.0001

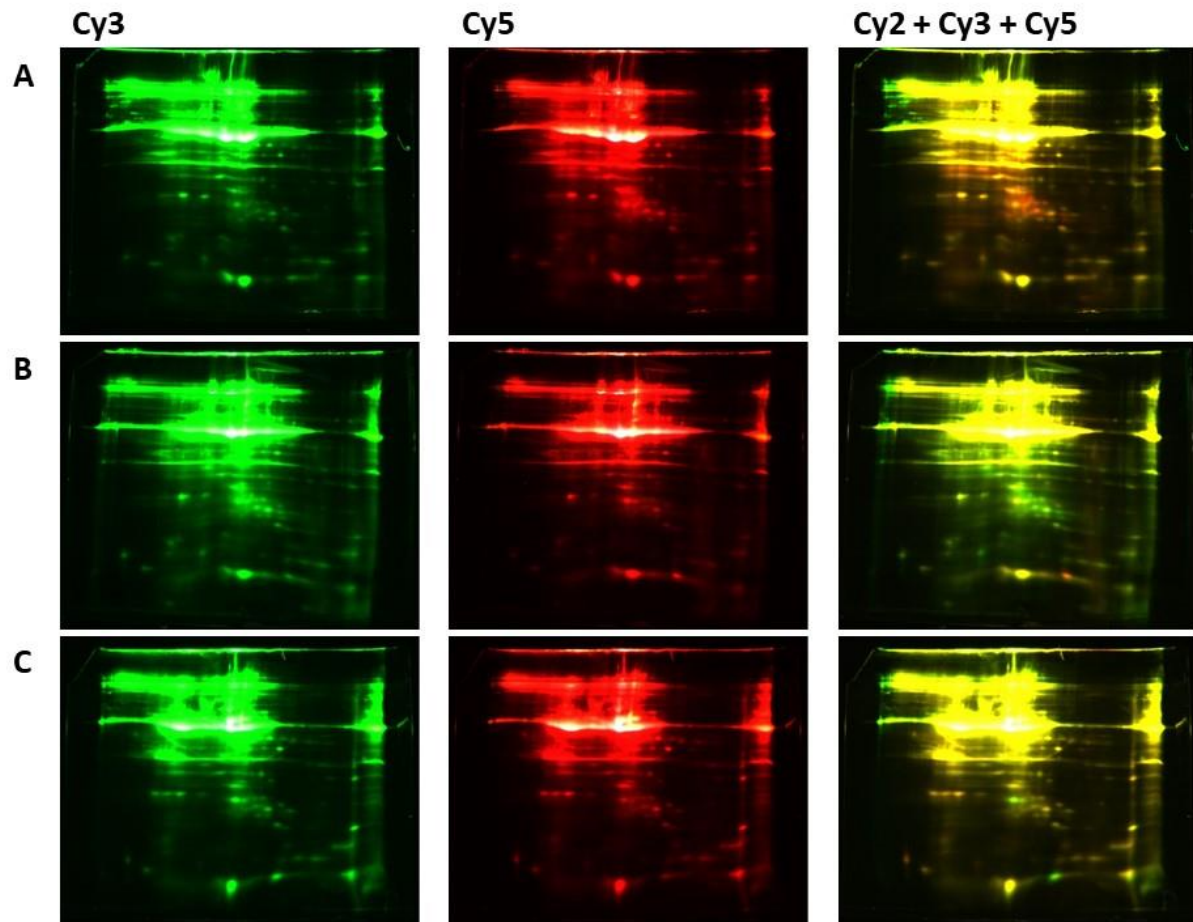

**Figure S1.** The gel images of 2-D Fluorescence Difference Gel Electrophoresis. An internal standard is comprised of the equal amounts of the proteins from each study group (Controls, PEX patients, and RVO patients) is labeled with Cy2. A. Protein pool of PEX patients and the controls are labeled with Cy3 and Cy5, respectively. B. Protein pool of PEX and RVO patients are labeled with Cy3 and Cy5, respectively. C. Protein pool of RVO patients and the controls are labeled with Cy3 and Cy5, respectively. The internal standard is loaded in each 2D gel experiment. Cy2+Cy3+Cy5 on the right panel of each 2D gel experiment is the merged image of Cy3 and Cy5 labeled study group and Cy2 labeled reference pool.

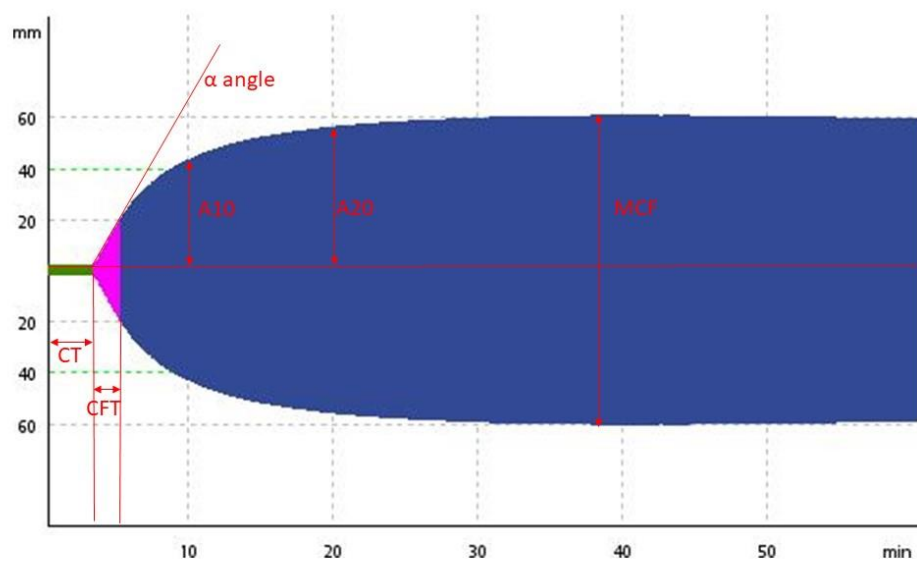

**Figure S2.** ROTEM parameters depicted on a EXTEM graph.

EXTEM

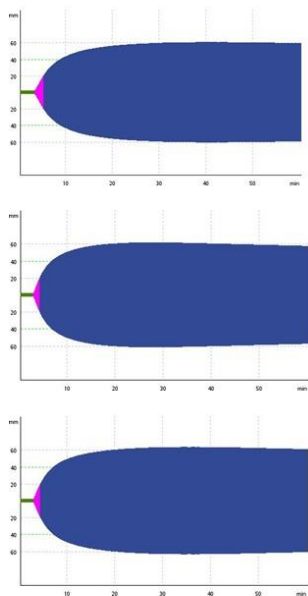

INTEM

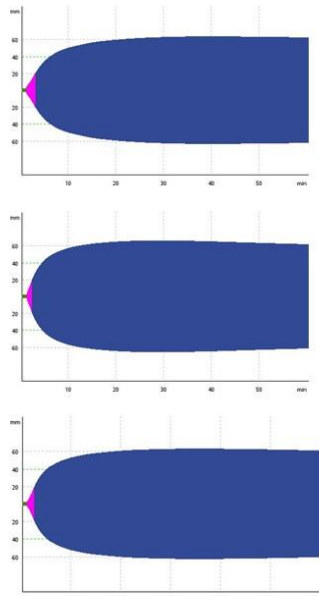

FIBTEM

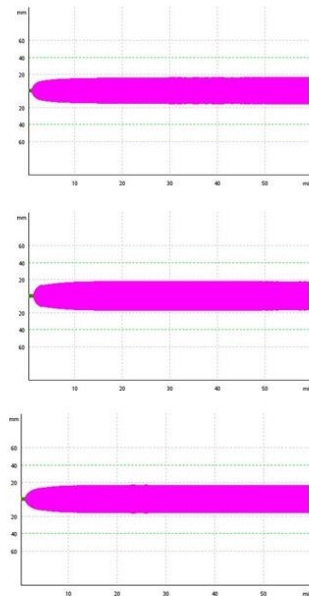

**Figure S3.** ROTEM tracings of 3 representative control subjects.

EXTEM

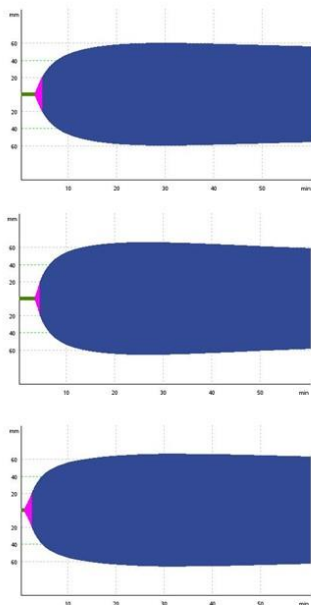

INTEM

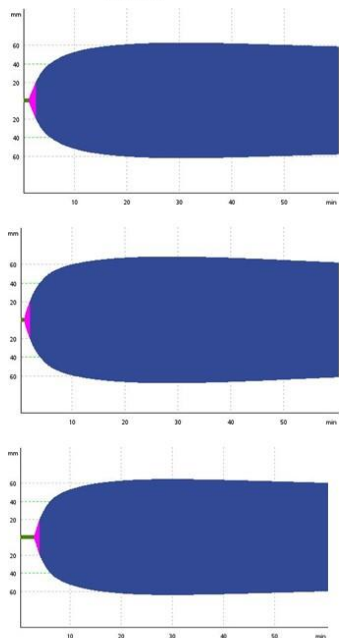

FIBTEM

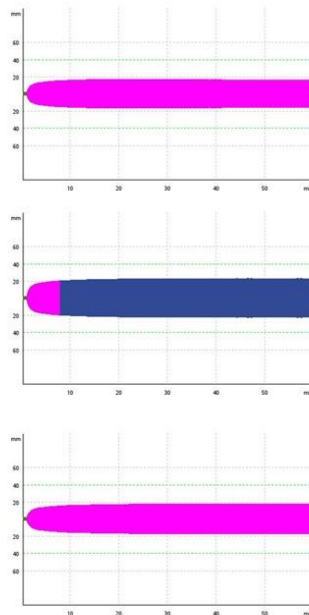

**Figure S4.** ROTEM tracings of 3 representative PEX patients.

EXTEM

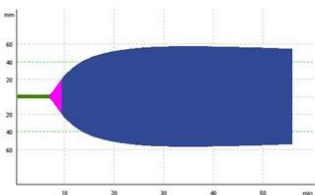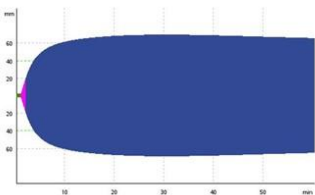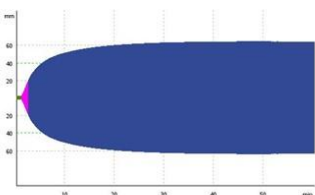

INTEM

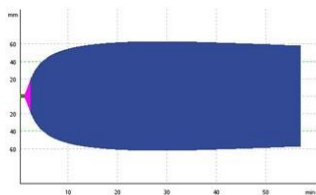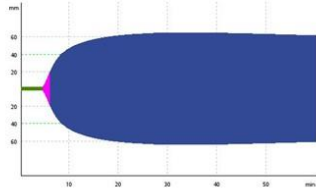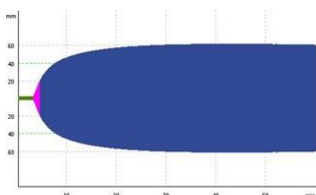

FIBTEM

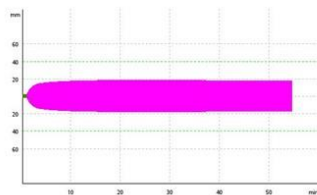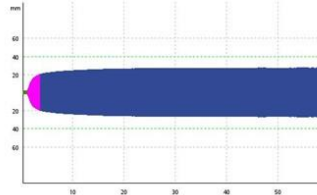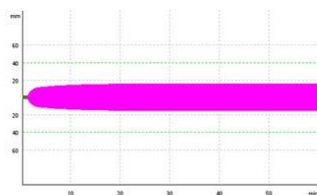

**Figure S5.** ROTEM tracings of 3 representative RVO patients.
